# Supplementary material for: A Spectroscopic Approach to Unravel the Local Conformations of G-quadruplex Using CD-active Fluorescent Base Analogues
Source: bioRxiv or medRxiv preprint supplement (doi:10.1101/2022.07.06.499065), 2022-08-10
Supplement: Supplementary file [file media-1.pdf]

## SUPPORTING INFORMATION

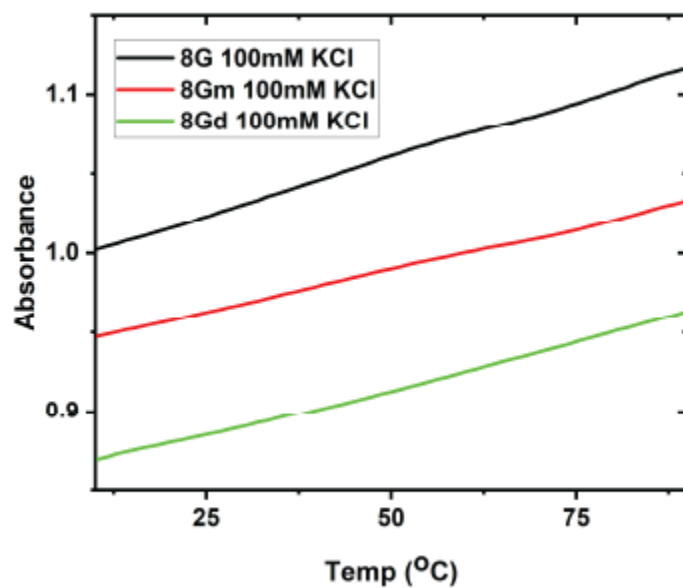

**Figure S1. Thermal denaturation curves monitored by the change in absorbance at 260 nm.**

(A) UV thermal denaturation curves of the unlabeled 8G, 6MI monomer labeled 8Gm and 6MI dimer labeled 8Gd GQ constructs in 100mM KCl, 10mM Tris pH 7.5 buffer at 260 nm.

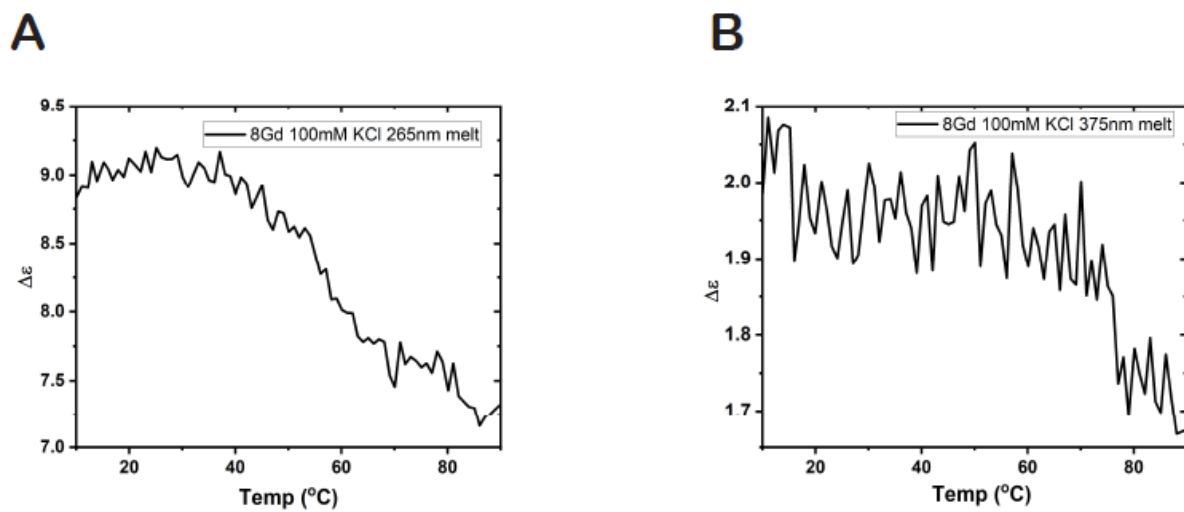

**Figure S2. Thermal denaturation curves monitored by CD changes of 8Gd constructs at 265 nm and 375 nm.** (A) CD thermal denaturation curves of 6MI dimer labeled 8Gd GQ constructs in 100mM KCl, 10mM Tris pH 7.5 buffer at 260 nm and (B) at 375 nm.
